# Supplementary material
Source: Springer Nature journal article supplement (https://www.springermedizin.de/resource/supplementary/12985_2010_1082_MOESM7_ESM.pdf/9609104)
Supplement: MOESM7 [file 9609104]

Genome segment ISAV strain Sequence is in 5' to 3' orientation

|           |             |            | 1      | 10     | 20    | 30   | 40   | 50             | 60      |
|-----------|-------------|------------|--------|--------|-------|------|------|----------------|---------|
| Segment 1 | NBISA01     | (HQ011270) |        |        |       |      |      |                | AMTAA   |
| Segment 1 | ADL-ISAV-07 | (HQ011262) |        |        |       |      |      |                | TCARAGA |
| Segment 2 | NBISA01     | (HQ011271) |        |        |       |      |      | TTTTGTGCGATGGT |         |
| Segment 2 | ADL-ISAV-07 | (HQ011263) |        |        |       |      |      | TTTTGTGAGATGGT |         |
| Segment 3 | NBISA01     | (HQ011272) | AACGGC | ACTATG | GAATA | CTAG | TTAC | CTA            | AGTT    |
| Segment 3 | ADL-ISAV-07 | (HQ011264) | AACGGC | ACTATG | GAATA | CTAG | TTAC | CTA            | AGTT    |
| Segment 4 | NBISA01     | (HQ011273) |        |        |       |      |      |                |         |
| Segment 4 | ADL-ISAV-07 | (HQ011265) |        |        |       |      |      |                |         |
| Segment 5 | NBISA01     | (HQ011274) | AATGT  | CGGT   | CAAA  | ATCT | TTT  | TTCT           | CGAC    |
| Segment 5 | ADL-ISAV-07 | (HQ011266) | AATGT  | CGGT   | CAAA  | ATCT | TTT  | TTCT           | CGAC    |
| Segment 6 | NBISA01     | (HQ011275) |        |        | TA    | TAA  | SACA | AAACA          | AGT     |
| Segment 6 | ADL-ISAV-07 | (HQ011267) |        |        | TA    | TAA  | SACA | AAACA          | AGT     |
| Segment 7 | NBISA01     | (HQ011276) |        |        |       |      |      | AGAT           | CTTT    |
| Segment 7 | ADL-ISAV-07 | (HQ011268) |        |        |       |      |      | AGAT           | CTTT    |
| Segment 8 | NBISA01     | (HQ011277) | AATG   | CACT   | TC    | TCA  | ATA  | CC             | TAT     |
| Segment 8 | ADL-ISAV-07 | (HQ011269) | AATG   | CACT   | TC    | TCA  | ATA  | CC             | TAT     |
| Segment 1 | NBISA01     | (HQ011270) | G      | GG     | TT    | G    | TAAA | AT             | TGA     |
| Segment 1 | ADL-ISAV-07 | (HQ011262) | G      | GG     | TT    | G    | TAAA | AT             | TGA     |
| Segment 2 | NBISA01     | (HQ011271) | G      | TAA    | AC    | CC   | CT   | TT             | G       |
| Segment 2 | ADL-ISAV-07 | (HQ011263) | G      | TAA    | AC    | CC   | CT   | TT             | G       |
| Segment 3 | NBISA01     | (HQ011272) | T      | AAT    | GG    | G    | T    | T              | GG      |
| Segment 3 | ADL-ISAV-07 | (HQ011264) | T      | AAT    | GG    | G    | T    | T              | GG      |
| Segment 4 | NBISA01     | (HQ011273) |        |        | G     | T    | G    | T              | T       |
| Segment 4 | ADL-ISAV-07 | (HQ011265) |        |        | T     | G    | T    | T              |         |
| Segment 5 | NBISA01     | (HQ011274) | T      | T      | A     | T    | A    | T              | A       |
| Segment 5 | ADL-ISAV-07 | (HQ011266) | T      | T      | A     | T    | A    | T              | A       |
| Segment 6 | NBISA01     | (HQ011275) | T      | A      | A     | T    | T    | A              | A       |
| Segment 6 | ADL-ISAV-07 | (HQ011267) | T      | A      | A     | T    | T    | A              | A       |
| Segment 7 | NBISA01     | (HQ011276) | -      | A      | A     | T    | T    | T              | A       |
| Segment 7 | ADL-ISAV-07 | (HQ011268) | -      | A      | A     | T    | T    | T              | A       |
| Segment 8 | NBISA01     | (HQ011277) | T      | G      | T     | A    | T    | T              | A       |
| Segment 8 | ADL-ISAV-07 | (HQ011269) | T      | G      | T     | A    | T    | T              | A       |
| Segment 1 | NBISA01     | (HQ011270) | A      | T      | A     | A    | A    | T              | T       |
| Segment 1 | ADL-ISAV-07 | (HQ011262) | A      | T      | A     | A    | A    | T              | T       |
| Segment 2 | NBISA01     | (HQ011271) | A      | G      | T     | A    | A    | A              | A       |
| Segment 2 | ADL-ISAV-07 | (HQ011263) | A      | G      | T     | A    | A    | A              | A       |
| Segment 3 | NBISA01     | (HQ011272) | A      | A      | A     | A    | A    | A              | A       |
| Segment 3 | ADL-ISAV-07 | (HQ011264) | A      | A      | A     | A    | A    | A              | A       |
| Segment 4 | NBISA01     | (HQ011273) | T      | C      | A     | A    | A    | A              | A       |
| Segment 4 | ADL-ISAV-07 | (HQ011265) | T      | C      | A     | A    | A    | A              | A       |
| Segment 5 | NBISA01     | (HQ011274) | T      | A      | A     | A    | A    | A              | A       |
| Segment 5 | ADL-ISAV-07 | (HQ011266) | T      | A      | A     | A    | A    | A              | A       |
| Segment 6 | NBISA01     | (HQ011275) | C      | A      | A     | A    | A    | A              | A       |
| Segment 6 | ADL-ISAV-07 | (HQ011267) | C      | A      | A     | A    | A    | A              | A       |
| Segment 7 | NBISA01     | (HQ011276) | A      | C      | A     | A    | A    | A              | A       |
| Segment 7 | ADL-ISAV-07 | (HQ011268) | A      | C      | A     | A    | A    | A              | A       |
| Segment 8 | NBISA01     | (HQ011277) | G      | A      | T     | A    | A    | A              | A       |
| Segment 8 | ADL-ISAV-07 | (HQ011269) | G      | A      | T     | A    | A    | A              | A       |
